# Supplementary material
Source: PubMed Central journal article supplement (PMC3575860)
Supplement: pro0022-0056-SD1.pdf [file pro0022-0056-SD1.pdf]

**Supplementary material for ‘Multiple binding modes for palmitate to barley lipid transfer protein facilitated by the presence of proline 12’.**

Comparison of  $r^{-3}$  averaged distances calculated from the simulation trajectories with the 25 inter-proton distances between palmitate and barley LTP derived from the experimental NOE cross-peak intensities. In each case the difference between the distance averaged over the simulation and the corresponding NMR-derived upper distance bound is listed (in nm). A negative value indicates that the distance in the simulation is shorter than the NMR-derived upper distance bound and so there is no violation. The data for the 1be2 NMR structure are given for comparison.

| NOE number | Atom 1  | Atom 2      | NMR structure | WT_LA_310 | WT_LA_NOE_310 | WT_LAH_310 | WT_LB_NOE_400 | M12_LAH_310 | M12,70_LAH_310 |
|------------|---------|-------------|---------------|-----------|---------------|------------|---------------|-------------|----------------|
| 10         | PLM H3* | 9 Lys HD*   | -0.143        | -0.209    | -0.041        | 0.316      | 0.02          | 0.795       | 0.498          |
| 11         | PLM H2* | 9 Lys HE*   | -0.100        | -0.251    | -0.081        | 0.472      | 0.0190        | 1.003       | 0.542          |
| 12         | PLM H2* | 69 Ile HG11 | -0.111        | 0.880     | 0.084         | -0.185     | -0.112        | -0.164      | 0.749          |
| 13         | PLM H2* | 10 Met HG*  | -0.380        | 0.290     | -0.349        | 0.036      | -0.05         | 0.730       | 0.470          |
| 14         | PLM H2* | 14 Leu HD*  | -0.467        | 0.592     | -0.357        | -0.340     | -0.120        | 0.305       | -0.114         |
| 15         | PLM H2* | 81 Ile HD*  | -0.398        | 0.624     | -0.105        | -0.091     | -0.262        | 0.955       | 0.0800         |
| 16         | PLM H2* | 81 Ile HG2  | -0.409        | 0.741     | -0.013        | -0.077     | -0.0380       | 0.938       | 0.387          |
| 17         | PLM H3* | 14 Leu HD*  | -0.290        | 0.531     | -0.349        | -0.415     | -0.278        | 0.255       | -0.133         |
| 18         | PLM H3* | 81 Ile HD*  | -0.203        | 0.556     | -0.118        | -0.116     | -0.315        | 0.900       | 0.0350         |
| 19         | PLM H3* | 81 Ile HG2  | -0.276        | 0.668     | -0.058        | -0.079     | -0.116        | 0.897       | 0.332          |
| 20         | PLM H3* | 27 Cys HB2  | -0.229        | 0.420     | -0.125        | -0.231     | -0.256        | 0.0910      | 0.598          |
| 21         | PLM H3* | 69 Ile HG2  | -0.252        | 0.553     | -0.092        | -0.255     | -0.184        | -0.230      | 0.529          |
| 22         | PLM H4* | 27 Cys HN   | -0.040        | 0.339     | -0.032        | -0.111     | -0.0110       | 0.180       | 0.558          |
| 23         | PLM H4* | 13 Cys HB*  | -0.265        | 0.219     | -0.324        | -0.092     | -0.247        | -0.010      | 0.108          |
| 24         | PLM HG* | 79 Tyr HA   | -0.074        | -0.040    | -0.063        | 0.073      | -0.105        | 0.030       | 0.112          |
| 25         | PLM HG* | 79 Tyr HE*  | -0.349        | 0.043     | -0.204        | -0.104     | -0.105        | 0.263       | 0.479          |
| 26         | PLM HG* | 35 His HD2  | -0.025        | 0.047     | -0.199        | -0.272     | -0.101        | 0.320       | -0.157         |
| 27         | PLM HG* | 48 Cys HA   | -0.292        | 0.076     | -0.188        | -0.131     | -0.261        | -0.219      | -0.010         |

|    |         |            |        |        |        |        |         |        |        |
|----|---------|------------|--------|--------|--------|--------|---------|--------|--------|
| 28 | PLM HG* | 45 Gln HN  | -0.112 | 0.483  | -0.061 | -0.005 | -0.0640 | 0.287  | 0.376  |
| 29 | PLM HG* | 44 Arg HA  | -0.280 | 0.101  | -0.319 | -0.340 | -0.297  | 0.044  | 0.060  |
| 30 | PLM HE* | 85 Ile HG2 | -0.215 | 0.190  | 0.008  | 0.204  | -0.0620 | 0.087  | 0.133  |
| 31 | PLM HE* | 51 Leu HD* | -0.590 | -0.502 | -0.443 | -0.405 | -0.475  | -0.280 | -0.526 |
| 32 | PLM HE* | 47 Val HG1 | -0.347 | -0.028 | -0.363 | -0.341 | -0.289  | -0.076 | -0.242 |
| 33 | PLM HD* | 34 Leu HD2 | -0.222 | -0.324 | -0.225 | -0.067 | -0.0980 | -0.310 | -0.094 |
| 34 | PLM HD* | 47 Val HG2 | -0.176 | 0.082  | -0.276 | -0.149 | -0.304  | 0.192  | 0.133  |
